## 26 Introduction

27 Late endosomes, lysosomes and autolysosomes constitute a broad class of sub-cellular  
28 compartments (Klumperman and Raposo, 2014; Wijdeven et al., 2016) that we will refer to here  
29 as endolysosomes for simplicity. These compartments play key cellular roles including transport  
30 of cellular proteins destined for degradation, metabolic sensing, membrane repair and signaling  
31 (Gould and Lippincott-Schwartz, 2009). The maturation level, fusion capacity with other sub-  
32 cellular compartments and downstream function of endolysosomes are regulated by their  
33 intracellular transport and sub-cellular positioning. For example, dispersal of lysosomes from the  
34 peri-nuclear region to the cell periphery increases their association with mTORC1 (mechanistic  
35 target of rapamycin complex 1) and leads to downregulation of autophagy (Kimura et al., 2008;  
36 Korolchuk and Rubinsztein, 2011; Korolchuk et al., 2011; Pu et al., 2016). The transport and  
37 subcellular positioning of endolysosomes are in turn regulated by a myriad of mechanisms  
38 (Maday et al., 2014) including motor activation (Elshenawy et al., 2020; Fu and Holzbaur, 2014;  
39 Fu et al., 2014), motor tug-of-war (Belyy et al., 2016; Hendricks et al., 2010; Soppina et al., 2009)  
40 and association of motors with microtubule tracks having distinct post-translational modifications  
41 (Guardia et al., 2016; Mohan et al., 2019; Nirschl et al., 2016).

42 Peripheral transport of endolysosomes is mediated by kinesin motors belonging to different  
43 kinesin families (Kif5, Kif1, Kif3) (Brown et al., 2005; Cardoso et al., 2009; Encalada et al., 2011;  
44 Mohan et al., 2019; Rosa-Ferreira and Munro, 2011), whereas dynein is responsible for their  
45 retrograde transport toward the perinuclear region (Granger et al., 2014; Reck-Peterson et al.,  
46 2018). Recent discovery of dynein activating adapters have revolutionized our understanding of  
47 how dynein mediates efficient retrograde transport (Elshenawy et al., 2020; McKenney et al.,  
48 2014; Olenick and Holzbaur, 2019; Reck-Peterson et al., 2018; Schroeder and Vale, 2016).  
49 Dynein assembles into an autoinhibitory, weakly processive conformation, while dynein activating  
50 adaptors are crucial for dynein's assembly with dynactin and the processive motility of the dynein-  
51 dynactin complex on microtubules (Chowdhury et al., 2015; McKenney et al., 2014; Schroeder  
52 and Vale, 2016; Urnavicius et al., 2018). Recent Cryo-EM studies showed that certain early  
53 endosomal dynein activating adapters including BICD2 and Hook3 recruit two dynein dimers  
54 (Urnavicius et al., 2018). *In vitro* assays further showed that these heteromeric dynein complexes  
55 move faster and navigate obstacles better compared to single dynein (Elshenawy et al., 2019;  
56 Ferro et al., 2019; Urnavicius et al., 2018). Hence, in addition to mediating dynein's interaction  
57 with dynactin and bringing dynein out of its auto-inhibitory conformation, these activators further  
58 improve the efficiency of dynein mediated motility by allowing two copies of dynein to assemble

59 together into complexes. Yet, to date, the stoichiometry of adapter-dynein-dynactin complexes on  
60 sub-cellular compartments *in vivo* and how these complexes are spatially organized on the  
61 membrane of sub-cellular compartments are not known. Dynein is recruited to endolysosomal  
62 compartments via the cholesterol-sensing tripartite complex Rab7-RILP-ORP1L (Johansson et  
63 al., 2007; Pfeffer, 2001; Rocha et al., 2009). Whether this tripartite complex can recruit multiple  
64 copies of dynein dimers to improve the efficiency of retrograde transport of endolysosomal  
65 compartments in response to cellular cues is unknown.

66 Super-resolution is a powerful tool for studying spatial nano-organization of proteins within the  
67 cell, yet, only a handful of studies have been carried out to date to visualize proteins on the  
68 membrane of sub-cellular compartments (Franke et al., 2019; Puchner et al., 2013). Previously,  
69 using super-resolution microscopy, we showed that dynein forms nano-clusters on microtubules  
70 consisting of small teams of dynein motors (Cella Zanicchi et al., 2019; Zanicchi et al., 2017a).  
71 However, whether these nano-clusters are formed on the membrane of endolysosomes, the  
72 mechanisms of nano-cluster formation and whether formation of larger nano-clusters containing  
73 more dynein motors lead to more efficient retrograde transport are not known. Here, using  
74 quantitative super-resolution microscopy, we show that dynein forms nano-clusters on  
75 endolysosomes, consisting of 1-4 dyneins. Our data suggest that for efficient retrograde transport,  
76 dynein should be present in multiples of two copies within nano-clusters (e.g. 4 dyneins). The  
77 copy number of dynein within nano-clusters is in turn regulated by membrane cholesterol levels  
78 and ORP1-L's cholesterol sensing domain.

79

## 80 **Results**

### 81 **Dynein forms nano-clusters on endolysosomes containing 1-4 dynein motors with a switch** 82 **to larger nano-clusters on peripheral versus peri-nuclear endolysosomes.**

83 To visualize the spatial organization of dynein on endolysosomal membranes we expressed  
84 mCherry-ORP1L in HeLa cells in which endogenous ORP1L was targeted by CRISPR/Cas9  
85 mutagenesis (ORP1L-KO)(Zhao and Ridgway, 2017). The mCherry-ORP1L signal substantially  
86 overlapped with that of CD63, an endolysosomal marker (Beatty, 2006; van der Kant et al., 2013;  
87 Vanlandingham and Ceresa, 2009), indicating that ORP1L marks endolysosomes (Figure 1--  
88 figure supplement 1A). Hence, we took mCherry-ORP1L positive sub-compartments in the wide-  
89 field images that were isolated, round and diffraction limited in size (200-500 nm FWHM) as an  
90 endolysosome for further analysis (Figure 1A and Figure 1--figure supplement 1B). To determine

91 whether dynein was clustered on these endolysosomes, we carried out super-resolution imaging  
92 of dynein labeled with an antibody against the dynein intermediate chain (IC74). These images  
93 revealed nano-clusters within the cell cytoplasm similar to what we have previously demonstrated  
94 (Cella Zanicchi et al., 2019) (Figure 1A-B). We manually cropped the central intensity peak of  
95 mCherry-ORP1L positive endolysosomes (Figure 1--figure supplement 1B and Methods) and  
96 used it as a mask in the super-resolution image to specifically segment dynein nano-clusters that  
97 overlapped with an endolysosomal compartment (Figure 1A-B). Dynein super-resolution images  
98 were further segmented into individual nano-clusters using a previously developed Voronoi  
99 tessellation approach (Figure 1--figure supplement 1C) (Levet et al., 2015). We then quantified  
100 the number of localizations per dynein nano-cluster for peripherally- and peri-nuclearly-positioned  
101 endolysosomes (Figure 1C). The peripheral and peri-nuclear endolysosomes were separated  
102 manually based on their proximity to the cell nucleus (Figure 1--figure supplement 1D). The  
103 number of localizations per nano-cluster is proportional to the nano-cluster size as well as to the  
104 copy number of dynein within nano-clusters (Cella Zanicchi et al., 2019; Zanicchi et al., 2017a).  
105 Surprisingly, we found that the dynein nano-clusters associated to peripheral endolysosomes  
106 contained a significantly higher number of localizations compared to peri-nuclear endolysosomes  
107 (mean =  $67 \pm 1.9$  for peripheral and  $54 \pm 1.8$  for perinuclear endolysosomes) (Figure 1C).

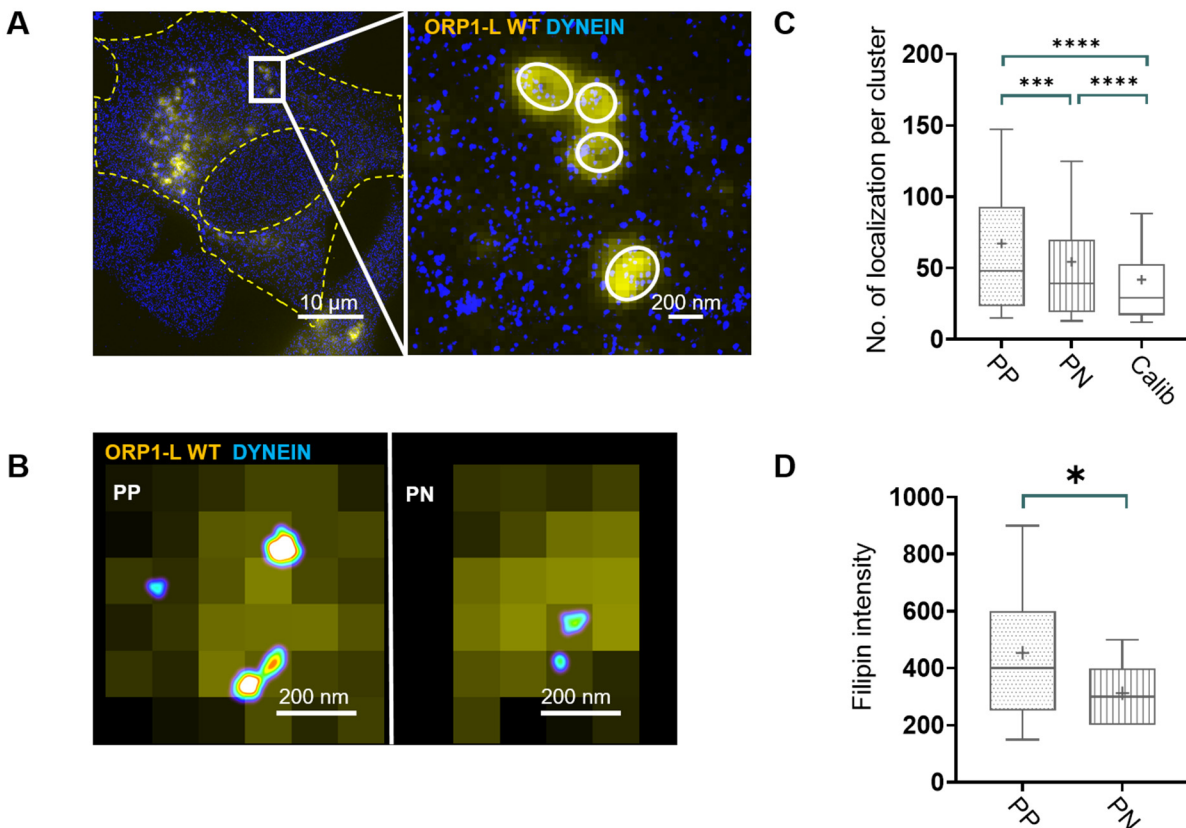

108

109 *Figure 1: Dynein forms larger nano-clusters containing a higher proportion of dynein multimers*  
110 *on endolysosomes positioned at the cell periphery:*

111 (A) *Cropped wide-field image of cells expressing full length ORP1L fused to mCherry*  
112 *(mCherry-ORP1L-WT, yellow) overlaid with super-resolution image of dynein (blue). Cell*  
113 *edge and nucleus are highlighted in yellow dashed lines. A zoom of the white rectangle is*  
114 *shown in which mCherry-ORP1L-WT positive endolysosomes are highlighted with white*  
115 *circles.*

116 (B) *An overlay of wide-field image of ORP1L (yellow) and super-resolution image of dynein*  
117 *(image is color coded according to localization density with higher density corresponding*  
118 *to white and lower density corresponding to cyan) for an endolysosome positioned at the*  
119 *cell periphery (PP) and peri-nuclear region (PN).*

120 (C) *Box plot showing the number of localizations per dynein nano-cluster for peripherally*  
121 *positioned endolysosomes (PP) ( $n=195$  endolysosomes from  $n=6$  cells,  $n=2$  experiments,*  
122 *mean  $67 \pm 1.9$ ), peri-nuclearly positioned endolysosomes (PN) ( $n=210$  endolysosomes*  
123 *from  $n=6$  cells,  $n=2$  experiments, mean  $54 \pm 1.8$ ) and in cells in which dynein has been*

124 *labeled with a 100-fold dilution of the primary antibody for sparsely labeling single dynein*  
125 *motors (n=6 cells, n=1 experiments, see methods, mean  $42\pm 0.2$ ). The box corresponds*  
126 *to 25-75 percentile, the line corresponds to the median, the cross corresponds to the*  
127 *mean, and the whiskers correspond to 10-90 percentile. Statistical significance was*  
128 *assessed using a Kolmogorov-Smirnov-test with a p-value of. \*\*\*: 0.001, \*\*\*\*: <0.0001.*

129 (D) *Box plot showing the intensity of filipin, which binds cholesterol, on peripherally positioned*  
130 *endolysosomes (PP) (n=44 endolysosomes from n=4 cells, n=2 experiments, mean*  
131  *$454\pm 40$ ) versus peri-nuclearly positioned endolysosomes (PN) (n=41 endolysosomes*  
132 *from n=5 cells, n=2 experiments, mean  $312\pm 19$ ). The box corresponds to 25-75 percentile,*  
133 *the line corresponds to the median, the cross corresponds to the mean and the whiskers*  
134 *correspond to 10-90 percentile. Statistical significance was assessed using a Kolmogorov-*  
135 *Smirnov-test with a p-value of 0.02*

136 To obtain a quantitative estimate of the copy number of dynein within nano-clusters, we carried  
137 out a calibration experiment in which we diluted the primary antibody by 100-fold, aiming to  
138 sparsely label single copies of dynein (Ehmann et al., 2014) (Figure 1--figure supplement 1E and  
139 Methods). We then used the number of localizations per dynein nano-cluster in these sparse  
140 labeling experiments as a calibration corresponding to a single dynein motor (Figure 1C, Figure  
141 1--figure supplement 1F). We previously showed that fitting the distribution of the number of  
142 localizations per nano-cluster to a linear convolution of monomeric calibration functions enables  
143 estimation of the copy number composition of a protein of interest in super-resolution images  
144 (Zanacchi et al., 2017b). Using this approach, we estimated that nano-clusters on peri-nuclear  
145 endolysosomes mainly consist of 1-2 copies of dynein motor (74% single, 11% 2, 7% 3 and 8%  
146 4 copies) (Figure 1--figure supplement 1F). Interestingly, on peripheral endolysosomes the  
147 proportion of nano-clusters containing 1-2 dynein motors decreased and the proportion of nano-  
148 clusters containing 3-4 motors increased (70% single, 2% 2, 9% 3 and 18% 4 copies of dynein  
149 (Figure 1--figure supplement 1F). In particular, there was a 2-fold increase in the proportion of  
150 nano-clusters with 4 copies of dynein on peripheral endolysosomes. We next asked if the  
151 membrane cholesterol content may be responsible for the increased dynein clustering and the  
152 switch from primarily 1-2 copies of dynein to increased 3-4 copies of dynein on peripheral  
153 endolysosomes. To start addressing this question, we measured the cholesterol levels of  
154 peripheral and peri-nuclear endolysosomes by labeling mCherry-ORP1L expressing HeLa cells  
155 with filipin, a toxin that binds cholesterol. We measured the filipin intensity on mCherry-ORP1L  
156 positive endolysosomes and found that membrane cholesterol levels of peripheral  
157 endolysosomes were indeed higher compared to peri-nuclear endolysosomes (Figure 1D). These

158 results indicate a correlation between endolysosomal membrane cholesterol levels,  
159 endolysosomal positioning and dynein clustering.

160

161 **Membrane cholesterol levels determine the level of dynein clustering and dynein copy**  
162 **number within nano-clusters on endolysosomes.**

163 It is known that positioning of endolysosomal compartments in the cell affects their membrane  
164 composition, maturation and signaling (Cabukusta and Neefjes, 2018; Hu et al., 2015; Hyttinen  
165 et al., 2013). To better understand the mechanisms behind dynein clustering and to causally relate  
166 dynein clustering to endolysosomal membrane cholesterol levels, we manipulated cholesterol  
167 levels with two commonly used drugs: U18666A that increases endolysosomal membrane  
168 cholesterol and Lovastatin that decreases cellular and endolysosomal membrane cholesterol  
169 levels (Keyomarsi, 1996; Rocha et al., 2009). mCherry-ORP1L-positive endolysosomes in  
170 ORP1L KO HeLa cells treated with U18666A indeed had higher membrane cholesterol levels (by  
171 4.5-fold) compared to those in cells treated with lovastatin as measured by filipin intensity (Figure  
172 2--figure supplement 1A). We will refer to the endolysosomal membrane cholesterol content of  
173 the U18666A and Lovastatin treated cells as 'high cholesterol' and 'low cholesterol' condition,  
174 respectively.

175 Super-resolution imaging revealed that dynein nano-clusters on endolysosomal compartments  
176 contained a significantly higher number of localizations under high cholesterol compared to low  
177 cholesterol conditions (mean =  $71 \pm 1.9$  for high and  $50 \pm 1.9$  for low cholesterol) (Figure 2A-B).

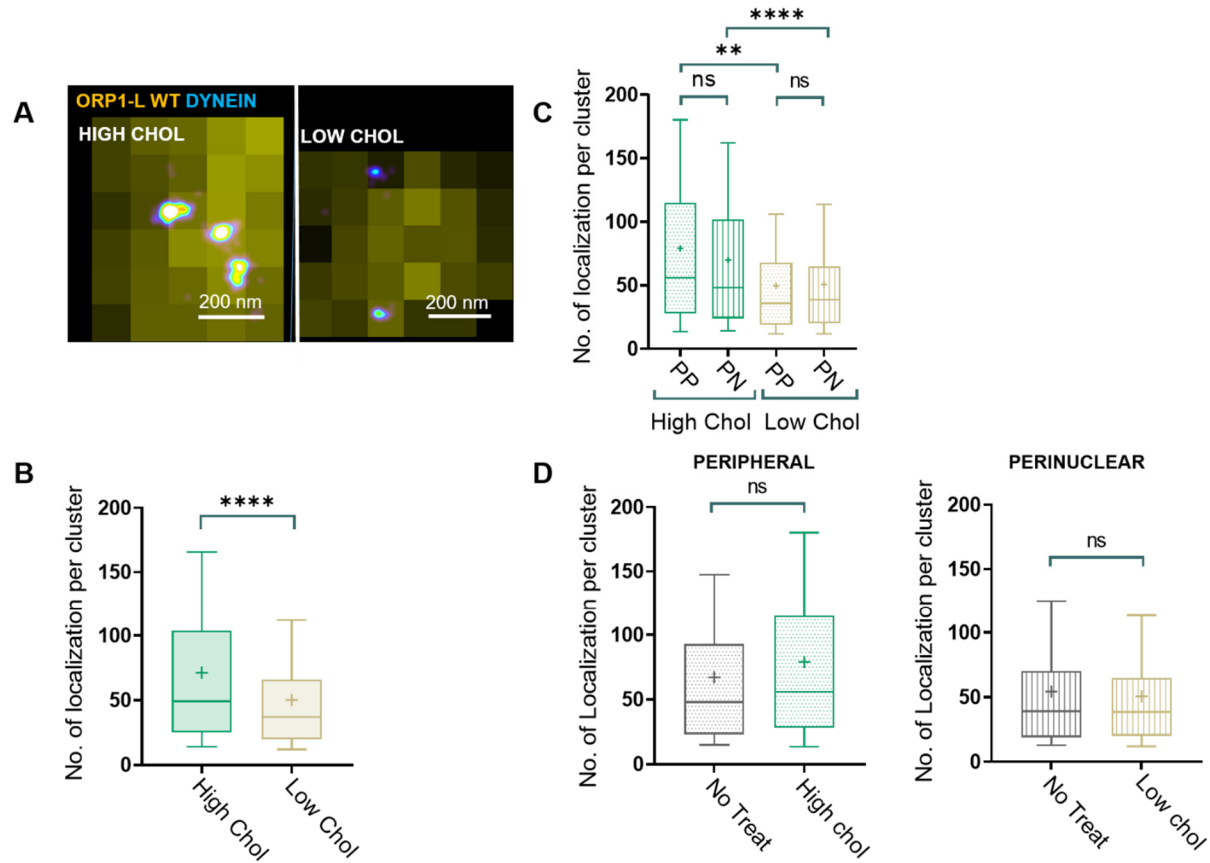

178

179 *Figure 2: Dynein forms larger nano-clusters containing a higher proportion of dynein multimers*  
 180 *on endolysosomes that have high cholesterol content compared to those that have low cholesterol*  
 181 *content:*

182 (A) *An overlay of cropped wide-field image of ORP1L (yellow) and super-resolution image of*  
 183 *dynein (image is color coded according to localization density with higher density*  
 184 *corresponding to white and lower density corresponding to cyan) for an endolysosome in*  
 185 *cells treated with U18666A (High Chol) or Lovastatin (Low Chol).*

186 (B) *Box plot showing the number of localizations per dynein nano-cluster for endolysosomes*  
 187 *in U18666A treated cells (High Chol) (n=224 endolysosomes from n=6 cells, n=2*  
 188 *experiments, mean 71±1.9) versus Lovastatin treated cells (Low Chol) (n=217*  
 189 *endolysosomes from n=6 cells, n=2 experiments, mean 50±1.9). The box corresponds to*  
 190 *25-75 percentile, the line corresponds to the median, the cross corresponds to the mean*  
 191 *and the whiskers correspond to 10-90 percentile. Statistical significance was assessed*  
 192 *using a Kolmogorov-Smirnov-test with a p-value <0.0001.*



193 (C) Box plot showing the number of localizations per dynein nano-cluster for peripherally  
194 positioned ( $n=70$  endolysosomes from  $n=6$  cells,  $n=2$  experiments, mean  $79\pm 5$ ) or peri-  
195 nuclearily positioned ( $n=154$  endolysosomes from  $n=6$  cells,  $n=2$  experiments, mean  $70\pm 2$ )  
196 endolysosomes in U18666A treated cells (High Chol PP and High Chol PN, respectively)  
197 or Lovastatin treated cells (Low Chol PP;  $n=110$  endolysosomes from  $n=6$  cells,  $n=2$   
198 experiments, mean  $50\pm 2.7$  and Low Chol PN;  $n=107$  endolysosomes from  $n=6$  cells,  $n=2$   
199 experiments, mean  $51\pm 2.8$ , respectively). The box corresponds to 25-75 percentile, the  
200 line corresponds to the median, the cross corresponds to the mean and the whiskers  
201 correspond to 10-90 percentile. Statistical significance was assessed using a Kolmogorov-  
202 Smirnov-test with a  $p$ -value of n.s.: 0.27, n.s.: 0.93, \*\*: 0.001, \*\*\*\*:  $<0.0001$ .

203 (D) Box plot showing the number of localizations per dynein nano-cluster for peripherally  
204 positioned endolysosomes in untreated cells (No Treat) ( $n=195$  endolysosomes from  $n=6$   
205 cells,  $n=2$  experiments, mean  $67\pm 1.9$ ) and U18666A treated cells (High Chol) ( $n=70$   
206 endolysosomes from  $n=6$  cells,  $n=2$  experiments, mean  $79\pm 5$ ); as well as in perinuclearily  
207 positioned endolysosomes in untreated cells (No Treat) ( $n=210$  endolysosomes from  $n=6$   
208 cells,  $n=2$  experiments, mean  $54\pm 1.8$ ) and Lovastatin treated cells (Low Chol) ( $n=107$   
209 endolysosomes from  $n=6$  cells,  $n=2$  experiments, mean  $51\pm 2.8$ ). The box corresponds to  
210 25-75 percentile, the line corresponds to the median, the cross corresponds to the mean  
211 and the whiskers correspond to 10-90 percentile. Statistical significance was assessed  
212 using a Kolmogorov-Smirnov-test with a  $p$ -value of 0.1353 and 0.7.

213 These differences were not due to an increase in dynein expression level upon high cholesterol  
214 drug treatment, as western blot analysis showed that the level of dynein expression did not  
215 increase under high cholesterol treatment (Figure 2--figure supplement 1B). We fit the number of  
216 localizations per nano-cluster distribution to the calibration data to determine dynein copy number  
217 within nano-clusters under high and low cholesterol conditions (Figure 2--figure supplement 1C).  
218 This analysis showed that dynein nano-clusters change from containing mainly single dynein  
219 motors to containing an increased proportion of dynein multimers (75% single, 9% 2, 13% 3 and  
220 3% 4 copies of dynein under low cholesterol conditions and 58% single, 13% 2, 1.2% 3 and 27%  
221 4 copies of dynein under high cholesterol conditions) (Figure 2--figure supplement 1C).  
222 Interestingly, there was a dramatic increase in the proportion of nano-clusters containing 4 copies  
223 of dynein (9-fold) similar to the observations for peripheral versus peri-nuclear endolysosomes.  
224 Finally, low cholesterol levels also led to an increase in the percentage of endolysosomes that  
225 completely lacked dynein (Figure 2--figure supplement 1D, Low chol: 55%, High Chol: 27%).

226 We next analyzed the cholesterol levels of and dynein nano-cluster size on peripheral and peri-  
227 nuclear endolysosomes under the two cholesterol treatment conditions. In contrast to  
228 physiological conditions, peripheral and peri-nuclear endolysosomes had similar cholesterol  
229 levels (Figure 2--figure supplement 1E) and similar dynein clustering under both high and low  
230 cholesterol conditions (High cholesterol: mean =  $79\pm 9$  and  $70\pm 2$  localizations per cluster for  
231 peripheral and peri-nuclear endolysosomes, respectively and Low Cholesterol: mean =  $50\pm 2.7$   
232 and  $51\pm 2.8$  localizations per cluster for peripheral and peri-nuclear endolysosomes, respectively)  
233 (Figure 2C). Interestingly, the dynein clustering level of peri-nuclear endolysosomes under  
234 physiological conditions (mean =  $54\pm 1.8$  localizations per cluster) was similar to those under low  
235 cholesterol conditions (mean =  $51\pm 1.8$  localizations per cluster) and the dynein clustering level of  
236 peripheral endolysosomes under physiological conditions (mean =  $67\pm 1.9$  localizations per  
237 cluster) was similar to those under high cholesterol conditions (mean =  $79\pm 5$  localizations per  
238 cluster) (Figure 2D). These results indicate that cholesterol levels and not endolysosome  
239 positioning determine the level of dynein clustering on endolysosomal membranes. Finally, the  
240 positioning of endolysosomes was impacted by cholesterol levels, with low cholesterol leading to  
241 more scattered and high cholesterol leading to more peri-nuclearly positioned endolysosomes  
242 (Figure 2--figure supplement 1F), consistent with previous results (Rocha et al., 2009).

243 Taken together our results show that membrane cholesterol levels impact not only dynein  
244 recruitment but importantly also the level of dynein clustering and the proportion of dynein  
245 multimers on endolysosomal membranes, impacting the balance between antero- and retro-grade  
246 transport of these compartments and leading to their re-positioning with respect to the cell peri-  
247 nuclear region.

248

249 **The cholesterol sensing domain of ORP1L regulates ORP1L clustering on endolysosomal**  
250 **membranes in a cholesterol dependent manner.**

251 Dynein does not bind directly to endolysosomal membranes and the mechanisms that can lead  
252 to the formation of larger dynein nano-clusters with increased number of dynein motors in them  
253 are unknown. Dynein is recruited to endolysosomes through a tripartite complex of Rab7-ORP1L-  
254 RILP (Johansson et al., 2007; Pfeffer, 2001; Rocha et al., 2009). ORP1L contains multiple lipid  
255 binding domains that allow it to bind to either oxysterols or phospholipids (Johansson et al., 2005;  
256 Olkkonen and Li, 2013; Zhao and Ridgway, 2017). Hence, we asked whether the cholesterol  
257 sensing domain of ORP1L is responsible for regulating dynein clustering on endolysosomal

258 membranes. To address this question, we first imaged ORP1L's spatial distribution on  
259 endolysosomes in wild type or ORP1L-KO HeLa cells that express mCherry-ORP1L (Zhao and  
260 Ridgway, 2017) under low or high cholesterol treatment conditions using super-resolution  
261 microscopy (Figure 3A). We again analyzed isolated, round mCherry-ORP1L positive  
262 endolysosomes within a size range of 50-500 nm in the super-resolution images. ORP1L  
263 appeared uniformly distributed on the endolysosomal membrane under low cholesterol conditions  
264 and more clustered under high cholesterol conditions (Figure 3A).

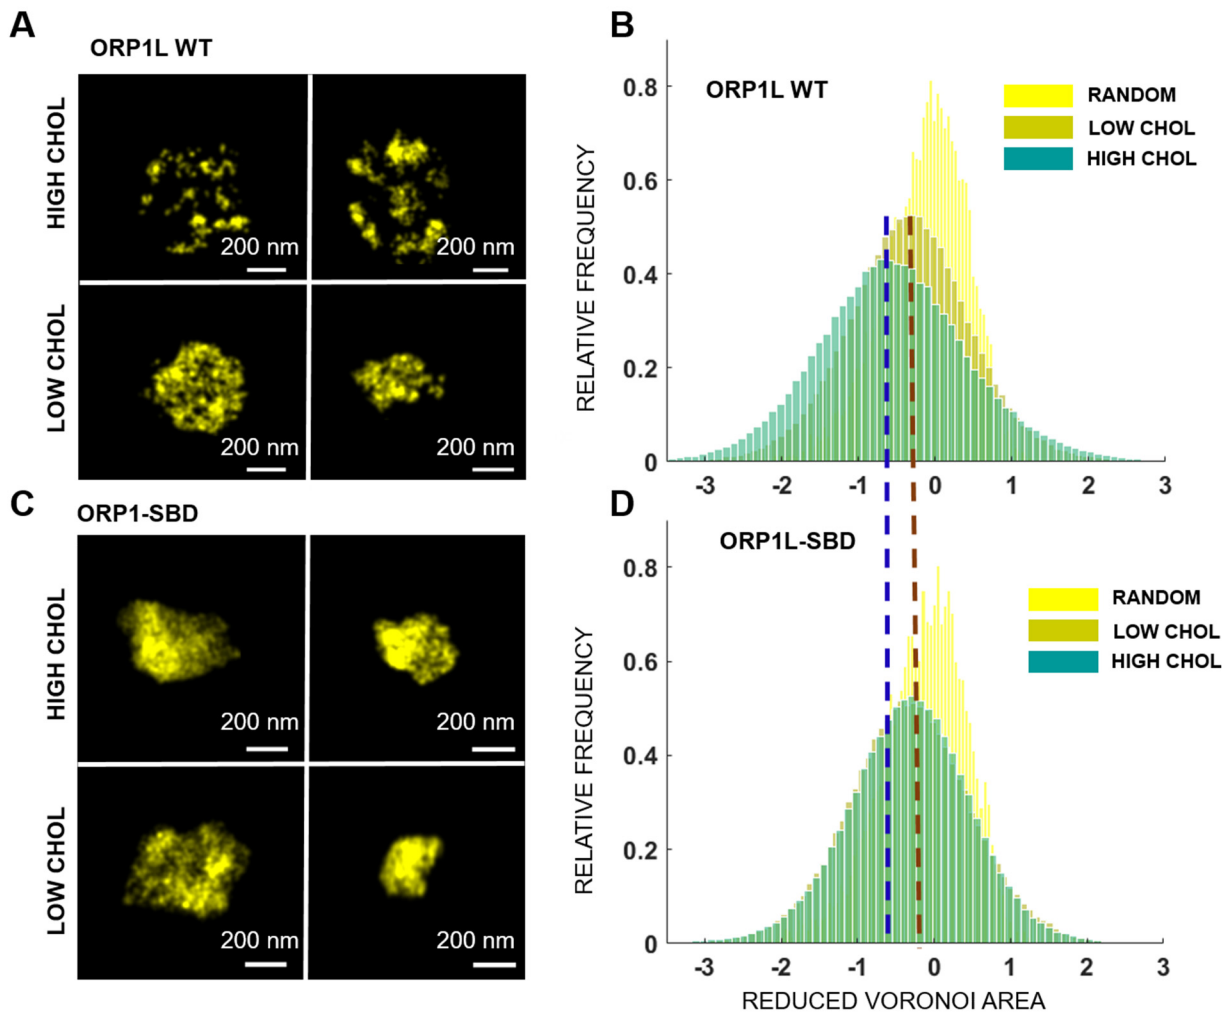

265

266 *Figure 3: ORP1L is more clustered on endolysosomes having higher cholesterol levels in a*  
267 *manner dependent on its cholesterol binding domain:*

268 (A) Super-resolution images of full length ORP1L (mCherry-ORP1L-WT) in cells treated with  
269 U18666A (High Chol, upper panels) and in cells treated with Lovastatin (Low Chol, lower  
270 panels).

271 (B) Log plot of the Reduced Voronoi Polygon area distribution for super-resolution images of  
272 full length ORP1L (mCherry-ORP1L-WT) in cells treated with U18666A (dark green, High  
273 Chol) (n=95 endolysosomes from n=6 cells, n=2 experiments), Lovastatin (light green,  
274 Low Chol) (n=107 endolysosomes from n=6 cells, n=2 experiments) and for a random  
275 distribution of localizations (yellow, Random). The dashed lines are a guide to the eye to  
276 highlight the shift in the peak position of Reduced Voronoi Polygon area distributions with  
277 cholesterol treatment for full length ORP1L (mCherry-ORP1L-WT) and sterol binding  
278 deficient ORP1L mutant lacking residues 560-563 (mCherry-ORP1L-SBD).

279 (C) Super-resolution images of sterol binding deficient ORP1L mutant lacking residues 560-  
280 563 (mCherry-ORP1L-SBD) in cells treated with U18666A (High Chol, upper panels) and  
281 in cells treated with Lovastatin (Low Chol, lower panels).

282 (D) Log plot of the Reduced Voronoi Polygon area distribution for super-resolution images of  
283 sterol binding deficient ORP1L mutant lacking residues 560-563 (mCherry-ORP1L-SBD)  
284 in cells treated with U18666A (dark green, High Chol) (n=120 endolysosomes from n=6  
285 cells, n=2 experiments), Lovastatin (light green, Low Chol) (n=170 endolysosomes from  
286 n=6 cells, n=2 experiments) and for a random distribution of localizations (yellow,  
287 Random).

288 To quantify the level of ORP1L clustering, we once again used Voronoi tessellation to segment  
289 individual ORP1L clusters on endolysosomal membranes. This approach revealed an increased  
290 number of ORP1L clusters under high cholesterol (mean =  $2.6 \pm 0.32$  clusters per endolysosome)  
291 compared to low cholesterol (mean =  $1 \pm 0.04$  clusters per endolysosome) conditions (Figure 3--  
292 figure supplement 1A). However, we also found that, surprisingly, the localization density of  
293 ORP1L was higher on endolysosomes under low compared to high cholesterol conditions (Figure  
294 3--figure supplement 1B), suggesting that more ORP1L binds to endolysosomes when their  
295 membrane cholesterol levels are lower. To ensure that the increased protein density does not  
296 confound the clustering analysis using Voronoi tessellation, which is dependent on localization  
297 density, we developed an alternative quantification method that is insensitive to differences in  
298 localization density and protein amount (Methods). To this end, we carried out Voronoi tessellation  
299 and re-scaled the distribution of Voronoi polygon areas so that the mean area was set to unity.  
300 We refer to the re-scaled quantities as reduced areas. The distribution of reduced areas provides  
301 a means to measure the clustering tendency of ORP1L from various conditions without explicitly  
302 compensating for different localization densities. For a clustered distribution, we expected to see  
303 a shift in the mode of the reduced Voronoi polygon area distribution towards a smaller value.  
304 Indeed, the mode of the distribution for endolysosomal compartments under high cholesterol

305 conditions was shifted to smaller polygon areas compared to low cholesterol conditions or  
306 compared to a simulated random distribution, indicating that ORP1L is more clustered on  
307 endolysosomes with high membrane cholesterol levels (Figure 3B). We further used a statistical  
308 test (Kullback-Leibler Divergence or KL Divergence) to determine how much the ORP1L  
309 organization differed from a random distribution under low and high cholesterol conditions. The  
310 difference from the normalized random distribution of points to the experimental distribution, which  
311 we call the clustering tendency score, was 0.75 under high cholesterol and 0.14 under low  
312 cholesterol (a 5-fold difference). These results further confirm that ORP1L's organization on  
313 endolysosomal membranes deviated significantly more from a random distribution under high  
314 cholesterol compared to low cholesterol conditions. When endogenous ORP1L on CD63 positive  
315 endolysosomal compartments was imaged in wild type HeLa cells using an ORP1L antibody, it  
316 also was more clustered and had lower localization density under high cholesterol compared to  
317 low cholesterol conditions (Figure 3--figure supplement 1C-D), demonstrating that the results are  
318 not an artifact of ORP1L over-expression. Overall, these super-resolution data show that ORP1L,  
319 like dynein, is more clustered on endolysosomes having higher membrane cholesterol levels.

320 To determine if the differences in ORP1L's spatial distribution on endolysosomes were due to its  
321 cholesterol binding, we expressed mCherry fused to a sterol binding deficient ORP1L mutant  
322 lacking the residues 560–563 (mCherry-ORP1L-SBD) (Vihervaara et al., 2011; Zhao and  
323 Ridgway, 2017) in HeLa ORP1L KO cells (Figure 3C-D and Figure 3--figure supplement 1E-F).  
324 Super-resolution images of the mCherry-ORP1L-SBD mutant (Figure 3C) and both Voronoi  
325 cluster segmentation (Figure 3--figure supplement 1E) and reduced Voronoi polygon area  
326 distribution analysis (Figure 3D) (Clustering tendency score for ORP1L-SBD: 0.1 for high and  
327 0.09 for low cholesterol conditions) showed that the distribution of the ORP1L-SBD mutant was  
328 uniform on endolysosomal membranes independent of cholesterol levels. The membrane  
329 localization density of this mutant was overall high under both high and low cholesterol conditions  
330 (Figure 3--figure supplement 1F) and at a similar level to the full length ORP1L under low  
331 cholesterol conditions (Figure 3--figure supplement 1B). These results suggest that under low  
332 cholesterol or when ORP1L lacks its cholesterol sensing domain, it is recruited to and binds  
333 phospholipids on endolysosomes at a high level and likely in a non-specific manner. Finally, under  
334 physiological conditions (no cholesterol treatment) the full-length ORP1L was more clustered on  
335 peripherally positioned endolysosomes that have higher cholesterol levels whereas these  
336 differences in ORP1L clustering were absent for the ORP1L-SBD mutant (Figure 4--figure  
337 supplement 1A-B).

338 Overall, these results strongly support that the cholesterol sensing domain of ORP1L regulates  
339 its spatial distribution on endolysosomal membranes in a cholesterol dependent manner, with  
340 high cholesterol leading to more specific ORP1L recruitment (Figure 3--figure supplement 1B)  
341 and a clustered ORP1L spatial organization (Figure 3A-B).

342

343

344 **The cholesterol sensing domain of ORP1L regulates dynein clustering and endolysosomal**  
345 **positioning in a cholesterol dependent manner.**

346 Having established that ORP1L's cholesterol sensing domain regulates ORP1L's level of  
347 clustering on endolysosomal membranes in a cholesterol dependent manner, we next asked if  
348 ORP1L's spatial organization also impacts dynein clustering. We thus imaged dynein using super-  
349 resolution microscopy in ORP1L-KO HeLa cells expressing the mCherry-ORP1L-SBD mutant.  
350 Analysis of dynein nano-clusters on endolysosomes under high and low cholesterol conditions  
351 showed that dynein clustering was no longer sensitive to cholesterol levels in cells expressing the  
352 mCherry-ORP1L-SBD mutant as the sole ORP1L isoform (mean =  $51 \pm 1.2$  for high and  $53 \pm 0.88$   
353 for low cholesterol) (Figure 4A-B). In addition, the level of dynein clustering in cells expressing  
354 the mCherry-ORP1L-SBD mutant was similar to the level of dynein clustering under low  
355 cholesterol conditions in cells expressing the full length mCherry-ORP1L (mean =  $50 \pm 1.9$ )  
356 (compare Figure 2B and Figure 4B).

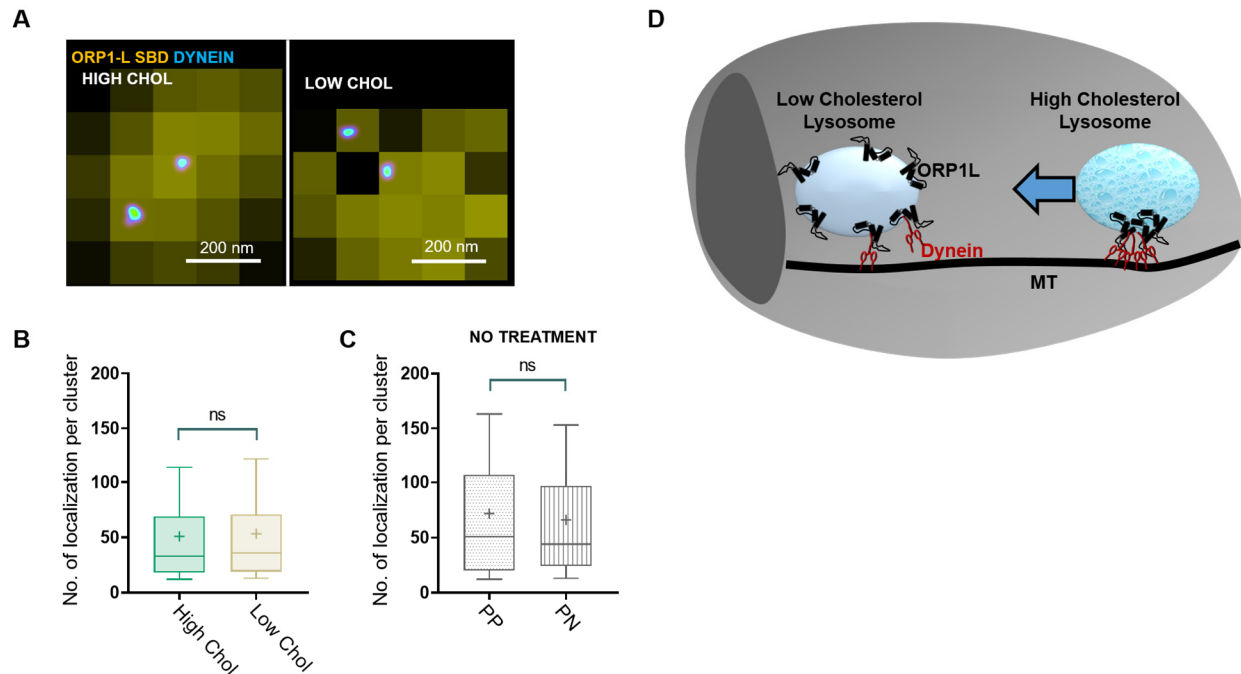

357

358 **Figure 4:** Dynein nano-clusters are insensitive to cholesterol levels in cells expressing sterol  
359 binding deficient ORP1L mutant:

360 (A) An overlay of cropped wide-field image of ORP1L (yellow) and super-resolution image of  
361 dynein (image is color coded according to localization density with higher density  
362 corresponding to white and lower density corresponding to cyan) for an endolysosome in  
363 cells expressing sterol binding deficient ORP1L mutant lacking residues 560-563  
364 (mCherry-ORP1L-SBD) and treated with U18666A (High Chol) or Lovastatin (Low Chol).

365 (B) Box plot showing the number of localizations per dynein nano-cluster for endolysosomes  
366 in cells expressing the sterol binding deficient ORP1L mutant lacking residues 560-563  
367 (mCherry-ORP1L-SBD) and treated with U18666A (High Chol) ( $n=450$  endolysosomes  
368 from  $n=6$  cells,  $n=2$  experiments, mean  $51 \pm 1.2$ ) versus Lovastatin (Low Chol) ( $n=300$   
369 endolysosomes from  $n=6$  cells,  $n=2$  experiments, mean  $53 \pm 0.88$ ). The box corresponds  
370 to 25-75 percentile, the line corresponds to the median, the cross corresponds to the mean  
371 and the whiskers correspond to 10-90 percentile. Statistical significance was assessed  
372 using a Kolmogorov-Smirnov-test with a  $p$ -value of 0.06.

373 (C) Box plot showing the number of localizations per dynein nano-cluster for peripherally  
374 positioned endolysosomes ( $n=100$  endolysosomes from  $n=5$  cells,  $n=2$  experiments,  
375 mean  $71 \pm 6$ ) and peri-nuclearly positioned endolysosomes ( $n=150$  endolysosomes from  
376  $n=5$  cells,  $n=2$  experiments, mean  $66 \pm 2$ ) in cells expressing the sterol binding deficient

377 *ORP1L mutant lacking residues 560-563 (mCherry-ORP1L-SBD). The box corresponds*  
378 *to 25-75 percentile, the line corresponds to the median, the cross corresponds to the mean*  
379 *and the whiskers correspond to 10-90 percentile. Statistical significance was assessed*  
380 *using a Kolmogorov-Smirnov-test with a p-value of 0.44.*

381 *(D) Cartoon model showing how cholesterol levels and ORP1L regulate dynein nano-*  
382 *clustering and endolysosome positioning. Peripheral lysosomes with higher cholesterol*  
383 *content have a more clustered organization of ORP1L and dynein leading to efficient*  
384 *retrograde transport (blue arrow). Perinuclear lysosomes having lower cholesterol content*  
385 *have more uniform ORP1L organization leading to lower dynein recruitment and clustering*  
386 *likely facilitating endolysosome anchoring at the peri-nuclear region or anterograde*  
387 *trafficking back to the cell periphery.*

388 The sub-cellular positioning of endolysosomes also became insensitive to cholesterol treatment  
389 in cells expressing the mCherry-ORP1L-SBD mutant and the endolysosomes were overall more  
390 scattered throughout the cell under high or low cholesterol conditions as well as under  
391 physiological conditions (Figure 4--figure supplement 1C). Finally, peripheral and peri-nuclear  
392 endolysosomes had similar level of dynein clustering in untreated cells expressing the mCherry-  
393 ORP1L-SBD mutant (mean =  $71 \pm 6$  localizations per cluster for high and  $66 \pm 2$  localizations per  
394 cluster for low cholesterol) (Figure 4C). Taken together, these results show that the increased  
395 clustering and higher copy number of dynein within nano-clusters on peripherally located  
396 endolysosomes with higher cholesterol content is dependent on the cholesterol binding and  
397 clustering ability of ORP1L (Figure 4D).

398

## 399 **Discussion**

400 Here using super resolution microscopy and quantitative analysis, we visualize the spatial  
401 organization of dynein motor and its adapter protein ORP1L on endolysosomal membranes. We  
402 find that dynein forms nano-clusters consisting of mainly single but also a small but significant  
403 proportion of multiple copies of dynein motor. Using perturbation experiments in which we  
404 manipulated endolysosomal membrane cholesterol levels we show that the level of dynein  
405 clustering and the copy number of dynein within nano-clusters on endolysosomal membrane is  
406 increased under high cholesterol. This increased clustering is regulated by the cholesterol binding  
407 ability of ORP1L that forms part of the Rab7-ORP1L-RILP tripartite complex, which recruits dynein  
408 to endolysosomal membranes.



409 Cryo-EM experiments demonstrated that BICD2 and Hook3 bind two copies of dynein motors  
410 (Urnavicius et al., 2018) but whether the endolysosomal adapter proteins Rab7-ORP1L-RILP also  
411 recruit multiple dyneins is unknown. Our results demonstrate that besides the stoichiometry  
412 between motor proteins and their adapter proteins, additional mechanisms inside cells are at play  
413 to increase motor protein clustering and retrograde transport efficiency. We show that clustering  
414 of adapter proteins into cholesterol enriched domains impacts the clustering of dynein motor on  
415 endolysosomal membranes, increasing the efficiency of retrograde transport. High cholesterol  
416 treatment increased the proportion of nano-clusters containing dynein multimers, with a big  
417 increase on the proportion of nano-clusters containing 4 copies of dynein. Peripheral  
418 endolysosomes also had a higher proportion of nano-clusters with 4 copies of dynein compared  
419 to perinuclear endolysosomes. These results suggest that having dynein present in multiple  
420 copies of two may be important for efficient retrograde transport, which is consistent with the  
421 recent Cryo-EM and *in vitro* single molecule imaging data showing that coupled dyneins move  
422 more processively and faster than single dynein (Urnavicius et al., 2018).

423 Previous *in vitro* work showed that early phagosomes engulfing 2-micron sized polystyrene beads  
424 isolated from dictyostelium cells were completely uniformly covered with dynein on their  
425 membrane whereas late phagosomes that move unidirectionally towards the retrograde direction  
426 had a highly clustered dynein distribution (Rai et al., 2016). These changes in dynein distribution  
427 were correlated to the membrane cholesterol content of phagosomes. In contrast, our results  
428 show that instead of uniformly covering the entire membrane, only a small number of dyneins are  
429 associated to endolysosomal membranes *in vivo*. A dramatic shift from a uniform dynein coverage  
430 to a highly clustered dynein distribution hence is not needed for regulating retrograde transport of  
431 native cellular compartments as these previous experiments with non-native compartments  
432 suggested. Instead, a small shift from mainly single copies of dynein to a small proportion of  
433 dynein multimers (in particular containing 4 dyneins) is sufficient to bias retrograde transport of  
434 native sub-cellular compartments.

435 Interestingly, the number of dyneins within nano-clusters is higher for peripherally located  
436 endolysosomes, which also have higher cholesterol levels. Endolysosomes contact the  
437 endoplasmic reticulum as they are trafficked within the cell cytoplasm (Friedman et al., 2013;  
438 Rocha et al., 2009; Zhao and Ridgway, 2017). Such contacts lead to exchange of membrane  
439 lipids and maturation of endolysosomes (van der Kant et al., 2013; Zhao and Ridgway, 2017). It  
440 is plausible that multiple endolysosome-ER contacts during retrograde transport play a role in  
441 lowering the cholesterol content of endolysosomes, leading to re-organization of ORP1L and

442 decreased dynein clustering. Hence, the peripheral endolysosomes with higher level of dynein  
443 clustering are potentially those that are on their way to be retrogradely transported. Future  
444 correlative live-cell and super-resolution imaging experiments (Balint et al., 2013; Mohan et al.,  
445 2019; Verdeny-Vilanova et al., 2017) will enable directly linking the transport properties of  
446 endolysosomes to the level of dynein clustering on their membrane. Loss of membrane  
447 cholesterol through ER contacts as these endolysosomes are retrogradely transported potentially  
448 leads to loss of dynein clustering facilitating stalling/positioning at the perinuclear region or  
449 anterograde trafficking back to the cell periphery via kinesin.

450 Previous studies showed that ORP1L, depending on its conformation, can either bind dynein or  
451 make contacts with the ER-membrane (Oikkonen and Li, 2013; Rocha et al., 2009; Wijdeven et  
452 al., 2016; Zhao and Ridgway, 2017). A change in ORP1L's conformation leads to shedding of  
453 dynein and initiation of contact between ORP1L and the ER-membrane protein VAP to regulate  
454 endolysosomal positioning (Rocha et al., 2009). Our results are consistent with these former  
455 studies as we show that in addition to the level of dynein clustering, the recruitment of dynein to  
456 endolysosomal compartments is also dependent on cholesterol levels. Under low cholesterol, the  
457 percentage of endolysosomes completely lacking dynein was increased by ~2-fold (from 27% to  
458 55%). However, around 45% of endolysosomes still contained dynein on their membrane even  
459 under low cholesterol conditions. Here, we additionally show that ORP1L's nanoscale spatial  
460 organization on the endolysosomal membranes is also dependent on cholesterol levels and  
461 regulates dynein clustering, not only dynein recruitment. Hence, multiple mechanisms, including  
462 recruitment of more dynein motors and clustering of the recruited dynein motors on the  
463 endolysosomal membrane, are at play to increase the efficiency of retrograde transport and  
464 regulate endolysosomal positioning. It will be interesting in the future to examine the differential  
465 impact of having more dynein versus having dynein clustered in copies of two on the transport  
466 and positioning of endolysosomes. It is plausible to hypothesize that increased dynein recruitment  
467 in the absence of dynein clustering is not sufficient for enhancing retrograde transport.

468 Overall, our results provide an *in vivo* mechanism dependent on cholesterol levels by which  
469 multiple dyneins can be recruited and clustered on endolysosomal membranes leading to their  
470 efficient retrograde transport and positioning. Increased dynein clustering in response to  
471 cholesterol levels is likely to be functionally significant as it impacts the sub-cellular positioning of  
472 endolysosomal compartments. Metabolic disorders that lead to accumulation of lipids including  
473 cholesterol in endolysosomal compartments like Niemann Pick Disease (NPC) are typically  
474 associated with alterations in endolysosomal homeostasis and function (Torres et al., 2017). In

475 the future it would be interesting to explore if the nanoscale organization of ORP1L and dynein is  
476 altered on endolysosomal membranes in NPC and other lysosomal storage disorders leading to  
477 their mislocalization within the cell and whether restoring the proper nanoscale organization of  
478 these cytoskeletal proteins can restore endolysosomal function. It would also be interesting to  
479 determine if similar mechanisms play a role in regulating kinesin clustering or in regulating  
480 transport of other organelles including Golgi vesicles and autophagosomes. It would further be  
481 exciting to determine the precise stoichiometry of adapter-motor complexes on organelle  
482 membranes to determine how the stoichiometry can be precisely tuned to regulate organelle  
483 transport and positioning. Our work establishes the methodology needed and opens the door to  
484 carry out these future studies.

485

486

487

## 488 **Materials and Methods**

### 489 **Cells and transfections**

490 Wild type HeLa cells were obtained from the American Type Culture Collection (CCL-2, ATCC,  
491 Manassas, VA). HeLa-ORP1L-null cell lines, as well as mCherry-tagged ORP1L and ORP1L-  
492 SBD constructs were a kind gift from Prof. Neale Ridgway (Dalhousie University, Depts. of  
493 Pediatrics, and Biochemistry and Molecular Biology, Atlantic Research Centre, Halifax, Nova  
494 Scotia, Canada). HeLa cells were grown in DMEM (GIBCO Laboratories, Grand Island, NY)  
495 supplemented with 10% fetal bovine serum and antibiotics, and maintained in 5% CO<sub>2</sub> at  
496 37°C. Cells were transiently transfected with mCherry-tagged wild type or mutant ORP1L at 70%  
497 confluency using Lipofectamine 2000 reagent (Invitrogen) according to the manufacturer's  
498 protocol. Cells were subjected to experimental treatments 24 h after transfection.

### 499 **Pharmacological treatment of cells**

500 Lovastatin (Sigma 1370600) was converted from its inactive prodrug form to its active open acid  
501 form by dissolving Lovastatin (52gms) in ethanol (95%, 1.04 ml), followed by addition of 1N NaOH  
502 (813 µl), followed by heating for 2 hrs at 50°C and neutralized with 1N HCL (pH 7.2). The volume  
503 was made up to 13 ml by adding distilled water, giving 10mM active Lovastatin solution later  
504 aliquoted and stored at -20°C(Keyomarsi, 1996). Mevalonic acid lactone (Sigma M4667, 1 gm)  
505 was converted to its active form by dissolving in ethanol (3.5 ml), followed by addition of 1N NaOH

506 (4.2 ml ) and heating for 2 hrs at 55°C. The solution was made up to 15.4 ml with distilled water  
507 and neutralized with 1N HCL (pH 7.2), giving 500 mM of stock solution, later aliquoted and stored  
508 at -20. U18666A (Sigma U3633) was dissolved in ethanol giving final concentration of  
509 10mg/ml(Rocha et al., 2009). For cholesterol depletion treatment, cells were cultured in DMEM,  
510 10% Lipoprotein deficient serum (Sigma S5394), 50uM Lovastatin, 230uM Mevalonate for 6 hrs  
511 before fixing for immunostaining. For high cholesterol treatment cells were cultured in DMEM,  
512 10% FBS and 3µg/ml U18666A for 12 hrs before fixing.

### 513 **Immunostating**

514 Hela ORP1L KO cells were transiently transfected with ORP1L WT-mCherry or ORP1L SBD-  
515 mCherry, treated with U18666A/Lovastatin or not treated and immunostained for ORP1L and  
516 dynein. Endogenous ORP1L was immunostained in untransfected Hela cells treated with  
517 U18666A/Lovastatin or not treated. For ORP1LWT/SBD-mCherry and endogenous ORP1L  
518 immunostaining, cells were fixed with 4% (Vol/Vol) Paraformaldehyde in PBS for 20 mins and for  
519 dynein immunostaining, cells were fixed in prechilled 1:1 Ethanol/Methanol solution for 3 mins on  
520 ice. The cells were blocked in blocking buffer (3% BSA, 0.2% Triton X-100 in PBS) for 1 hr. Cells  
521 were incubated with primary antibodies: Chicken anti-mCherry (Novus biotech nbp2-2515, 1:500)  
522 ,mouse anti-dynein (Abcam ab23905, 1:50 or 1:5000 for single dynein imaging) and rabbit anti-  
523 ORP1L (Abcam ab131165, 1:100) in blocking buffer for 1 hr on a rocker. Cells were washed with  
524 washing buffer (0.2% blocking buffer, .05% Triton X-100 in PBS) three times. Custom made  
525 secondary antibodies were labeled with an Alexa Fluor 405–Alexa Fluor A647 activator/reporter  
526 dye pair combination at concentrations (0.1-0.15 mg/µl) and used in the ratio of 1:50 in blocking  
527 buffer for 40 mins, at RT on a rocker. Sample was then washed three times in PBS.

### 528 **Filipin staining**

529 Filipin (Sigma F4767) was lyophilized, aliquoted (250 µg per aliquot) and stored at -80°C. Filipin  
530 was resuspended in 5 µl DMSO. Cells were fixed in 4% Paraformaldehyde for 20 mins and then  
531 rinsed 3 times with PBS. Background autofluorescence was quenched with 50mM NH<sub>4</sub>CL for 10  
532 mins. Cells were incubated for 2 hrs with 100 µg/ ml working solution of Filipin in 3% BSA. Cells  
533 were washed with 1% BSA in PBS three times before imaging. Imaging was performed  
534 immediately.

### 535 **Western blot**

536 Western blot analysis was performed using the two-color Odyssey LI-COR (Lincoln, NE)  
537 technique according to the manufacturer's protocol. A rabbit monoclonal antibody to ORP1L  
538 (ab131165, Abcam), mouse monoclonal antibody to dynein (ab23905, Abcam), and a mouse  
539 monoclonal antibody to detect GAPDH (clone 3B1E9, GenScript A01622–40) were used at a  
540 dilution of 1:1,000 in blocking buffer. The secondary antibody IRDye800CW Donkey anti-Rabbit  
541 and IRDye680RD Donkey anti-Mouse (LI-COR) were used in 1:10000 dilution for imaging in the  
542 green 800-nm and red 700-nm channels, respectively.

### 543 **STORM Imaging**

544 Single-molecule imaging was done using imaging buffer comprising of 50 mM Tris, pH 7.5, 10  
545 mM NaCl, 0.5 mg/mL glucose oxidase (Sigma, G2133), 40 µg/mL catalase (Roche Applied  
546 Science, 106810), 10% (w/v) glucose and 10% (v/v) Ciseamine (77mg/ml of 360mM HCL) (Bates  
547 et al., 2007). Images were acquired on the Oxford Nanoimager-S microscope which has the  
548 following configuration: 405, 488, 561, and 640 nm lasers, 498–551 and 576–620 nm band-pass  
549 filters in channel 1, and 665–705 nm band-pass filters in channel 2, 100× 1.4 NA objective  
550 (Olympus), and a Hamamatsu Flash 4 V3 sCMOS camera. Localizations were acquired with 10-  
551 ms exposure over 50,000 frames with 405 nm activation and 647 nm excitation. Images were  
552 processed and localizations were obtained using the NimOS localization software (Oxford  
553 Nanoimaging).

### 554 **Data Analysis**

555 To identify dynein clusters on ORP1L positive compartments, the intensity profile of conventional  
556 ORP1L image was used as a mask. Line intensity profile of the ORP1L conventional image along  
557 x and y axis was plotted on image J, and the width across one third of the full intensity maxima  
558 was considered as the mask (*Figure 1*--figure supplement 1B). For the dynein calibration  
559 experiments (100 fold diluted dynein antibody), dynein clusters were taken from the whole cell  
560 except the nucleus region to avoid biased results.

561 For quantitative analysis we used custom written MATLAB codes. A previously described method  
562 was adapted that segments super-resolution images based on Voronoi tessellation of the  
563 fluorophore localizations (Andronov et al., 2016; Levet et al., 2015). Voronoi tessellation of a  
564 STORM image assigns a Voronoi polygon to each localization, such that the polygon area is  
565 inversely proportional to the local localization density. The spatial distribution of dynein or ORP1L  
566 localizations from each ORP1L positive endolysosome is represented by a set of Voronoi  
567 polygons such that smaller polygon areas correspond to regions of higher density. The Voronoi

568 polygons at the endolysosomal edge are extremely large and were omitted for any quantification.  
569 Dynein and ORP1L clusters were segmented by grouping adjacent Voronoi polygons with areas  
570 less than a selected threshold and imposing a minimum number of localizations. For mCherry-  
571 ORP1L, mCherry-ORP1L-SBD, dynein (ORP1L positive endolysosomes) and dynein (ORP1L-  
572 SBD positive endolysosomes), the selected area thresholds were  $0.0156 \text{ px}^2$ ,  $0.02 \text{ px}^2$ ,  $0.01 \text{ px}^2$   
573 and  $0.01 \text{ px}^2$ , respectively and the minimum number of localizations imposed were 16, 10, 7 and  
574 7, respectively. ORP1L localization density was calculated by normalizing the total number of  
575 localizations per endolysosome by endolysosome area. Each endolysosome area was calculated  
576 by summing up all of its Voronoi polygon areas. The low cholesterol treatment yielded  
577 endolysosomes with ORP1L localization densities 4.5 times higher as compared to the high  
578 cholesterol treated endolysosome localization densities. To compare endolysosomal ORP1L  
579 distribution following cholesterol treatments, the ORP1L localization densities should be  
580 comparable. To address this we divided the Voronoi polygon areas of each endolysosome by its  
581 mean Voronoi polygon area, such that the mean localization density of each endolysosome is in  
582 reduced units of 1. All reduced Voronoi polygon areas from each endolysosome for each treatment  
583 were pulled together, and the histogram was plotted. The distribution of Voronoi areas from  
584 uniformly simulated random points is fit to an analytical distribution (Tanemura, 2003). A method  
585 for calculating the KL divergence between two histograms or between a histogram and an  
586 analytical distribution (Perez-Cruz, 2008) was implemented in Matlab. The KL divergence scores  
587 between the experimental reduced voronoi areas and the theoretical random distribution were  
588 calculated to determine the clustering tendency score of each cholesterol treatment. All ORP1L  
589 and dynein analysis has been done with endolysosomes with radius  $< 250\text{nm}$  for consistency.

590 For quantification of dynein copy numbers, the single dynein data was fit to a lognormal  
591 distribution from which the  $\mu$  and  $\sigma$  values are obtained. Using these values, the high and low  
592 cholesterol dynein data is fit for the sum of convolutions of the single dynein data until a good fit  
593 is obtained that does not change with fitting to higher copy number. Here, we fit until 4 dyneins.

594 Filipin intensity was calculated using Image J 'plot profile' tool. All ORP1L positive endolysosomes  
595 were analyzed by drawing a line segment across it and looking at its intensity profile using the  
596 'plot profile' tool. The average of 3-4 highest intensity points were taken and the average  
597 background intensity was subtracted from that. For the analysis of dynein clusters on ORP1L  
598 positive endolysosomal compartments, an intensity plot of the conventional ORP1L image was taken  
599 and all dynein clusters falling within the Full Width Half Maxima of the profile was accepted.

600

## 601 **Acknowledgements**

602 We thank Prof. Neale D. Ridgway, Dalhousie University for the Hela cells that are a knockout for  
603 ORP1L and for the mCherry-ORP1L and mCherry-ORP1L-SBD constructs. We thank Prof.  
604 Michael S. Marks, UPenn, for critical reading and feedback on the manuscript. ML acknowledges  
605 funding from the National Institutes of Health/National Institutes for General Medical Sciences  
606 (NIH/NIGMS) under the grant numbers: RO1 GM 133842-01 and 1RM1GM136511-01 and the  
607 Center for Engineering and Mechanobiology (CEMB) an NSF Science and Technology Center  
608 Pilot Award under grant agreement CMMI: 15-48571.

609

## 610 **Author Contributions**

611 ML and ST conceived of the study. ST prepared samples, carried out experiments, wrote software  
612 and analyzed data. P.K.R. wrote software and implemented the renormalized voronoi area  
613 distribution and KL-Divergence analysis methodology. E.M.S. maintained cell lines, carried out  
614 western blot experiments, carried out all transfections, provided reagents and helped with sample  
615 preparation. M.T.G. helped carry out dilution and calibration experiments. ML wrote the  
616 manuscript, acquired funding and supervised the work. All authors provided feedback on the  
617 manuscript.

618

619 **Competing Interests:** Authors declare no competing interests.

620

## 621 **References**

- 622 Andronov, L., I. Orlov, Y. Lutz, J.L. Vonesch, and B.P. Klaholz. 2016. ClusterViSu, a method for clustering of  
623 protein complexes by Voronoi tessellation in super-resolution microscopy. *Sci Rep.* 6:24084.
- 624 Balint, S., I. Verdeny Vilanova, A. Sandoval Alvarez, and M. Lakadamyali. 2013. Correlative live-cell and  
625 superresolution microscopy reveals cargo transport dynamics at microtubule intersections. *Proc*  
626 *Natl Acad Sci U S A.* 110:3375-3380.
- 627 Bates, M., B. Huang, G.T. Dempsey, and X. Zhuang. 2007. Multicolor super-resolution imaging with photo-  
628 switchable fluorescent probes. *Science.* 317:1749-1753.
- 629 Beatty, W.L. 2006. Trafficking from CD63-positive late endocytic multivesicular bodies is essential for  
630 intracellular development of *Chlamydia trachomatis*. *J Cell Sci.* 119:350-359.
- 631 Belyy, V., M.A. Schlager, H. Foster, A.E. Reimer, A.P. Carter, and A. Yildiz. 2016. The mammalian dynein-  
632 dynactin complex is a strong opponent to kinesin in a tug-of-war competition. *Nat Cell Biol.*  
633 18:1018-1024.

- 634 Brown, C.L., K.C. Maier, T. Stauber, L.M. Ginkel, L. Wordeman, I. Vernos, and T.A. Schroer. 2005. Kinesin-  
635 2 is a motor for late endosomes and lysosomes. *Traffic*. 6:1114-1124.
- 636 Cabukusta, B., and J. Neefjes. 2018. Mechanisms of lysosomal positioning and movement. *Traffic*. 19:761-  
637 769.
- 638 Cardoso, C.M., L. Groth-Pedersen, M. Hoyer-Hansen, T. Kirkegaard, E. Corcelle, J.S. Andersen, M. Jaattela,  
639 and J. Nylandsted. 2009. Depletion of kinesin 5B affects lysosomal distribution and stability and  
640 induces peri-nuclear accumulation of autophagosomes in cancer cells. *PLoS One*. 4:e4424.
- 641 Cella Zanacchi, F., C. Manzo, R. Magrassi, N.D. Derr, and M. Lakadamyali. 2019. Quantifying Protein Copy  
642 Number in Super Resolution Using an Imaging-Invariant Calibration. *Biophys J*. 116:2195-2203.
- 643 Chowdhury, S., S.A. Ketcham, T.A. Schroer, and G.C. Lander. 2015. Structural organization of the dynein-  
644 dynactin complex bound to microtubules. *Nat Struct Mol Biol*. 22:345-347.
- 645 Ehmann, N., S. van de Linde, A. Alon, D. Ljaschenko, X.Z. Keung, T. Holm, A. Rings, A. DiAntonio, S.  
646 Hallermann, U. Ashery, M. Heckmann, M. Sauer, and R.J. Kittel. 2014. Quantitative super-  
647 resolution imaging of Bruchpilot distinguishes active zone states. *Nature Communications*.  
648 5:4650.
- 649 Elshenawy, M.M., J.T. Canty, L. Oster, L.S. Ferro, Z. Zhou, S.C. Blanchard, and A. Yildiz. 2019. Cargo  
650 adaptors regulate stepping and force generation of mammalian dynein-dynactin. *Nat Chem Biol*.  
651 15:1093-1101.
- 652 Elshenawy, M.M., E. Kusakci, S. Volz, J. Baumbach, S.L. Bullock, and A. Yildiz. 2020. Lis1 activates dynein  
653 motility by modulating its pairing with dynactin. *Nat Cell Biol*. 22:570-578.
- 654 Encalada, S.E., L. Szpankowski, C.H. Xia, and L.S. Goldstein. 2011. Stable kinesin and dynein assemblies  
655 drive the axonal transport of mammalian prion protein vesicles. *Cell*. 144:551-565.
- 656 Ferro, L.S., S. Can, M.A. Turner, M.M. Elshenawy, and A. Yildiz. 2019. Kinesin and dynein use distinct  
657 mechanisms to bypass obstacles. *Elife*. 8.
- 658 Franke, C., U. Repnik, S. Segeletz, N. Brouilly, Y. Kalaidzidis, J.M. Verbavatz, and M. Zerial. 2019. Correlative  
659 single-molecule localization microscopy and electron tomography reveals endosome nanoscale  
660 domains. *Traffic*. 20:601-617.
- 661 Friedman, J.R., J.R. Dibenedetto, M. West, A.A. Rowland, and G.K. Voeltz. 2013. Endoplasmic reticulum-  
662 endosome contact increases as endosomes traffic and mature. *Mol Biol Cell*. 24:1030-1040.
- 663 Fu, M.M., and E.L. Holzbaaur. 2014. Integrated regulation of motor-driven organelle transport by  
664 scaffolding proteins. *Trends Cell Biol*. 24:564-574.
- 665 Fu, M.M., J.J. Nirschl, and E.L.F. Holzbaaur. 2014. LC3 binding to the scaffolding protein JIP1 regulates  
666 processive dynein-driven transport of autophagosomes. *Dev Cell*. 29:577-590.
- 667 Gould, G.W., and J. Lippincott-Schwartz. 2009. New roles for endosomes: from vesicular carriers to multi-  
668 purpose platforms. *Nat Rev Mol Cell Biol*. 10:287-292.
- 669 Granger, E., G. McNee, V. Allan, and P. Woodman. 2014. The role of the cytoskeleton and molecular  
670 motors in endosomal dynamics. *Semin Cell Dev Biol*. 31:20-29.
- 671 Guardia, C.M., G.G. Farias, R. Jia, J. Pu, and J.S. Bonifacino. 2016. BORC Functions Upstream of Kinesins 1  
672 and 3 to Coordinate Regional Movement of Lysosomes along Different Microtubule Tracks. *Cell*  
673 *Rep*. 17:1950-1961.
- 674 Hendricks, A.G., E. Perlson, J.L. Ross, H.W. Schroeder, 3rd, M. Tokito, and E.L. Holzbaaur. 2010. Motor  
675 coordination via a tug-of-war mechanism drives bidirectional vesicle transport. *Curr Biol*. 20:697-  
676 702.
- 677 Hu, Y.B., E.B. Dammer, R.J. Ren, and G. Wang. 2015. The endosomal-lysosomal system: from acidification  
678 and cargo sorting to neurodegeneration. *Transl Neurodegener*. 4:18.
- 679 Hyttinen, J.M., M. Niittykoski, A. Salminen, and K. Kaarniranta. 2013. Maturation of autophagosomes and  
680 endosomes: a key role for Rab7. *Biochim Biophys Acta*. 1833:503-510.



- 681 Johansson, M., M. Lehto, K. Tanhuanpaa, T.L. Cover, and V.M. Olkkonen. 2005. The oxysterol-binding  
682 protein homologue ORP1L interacts with Rab7 and alters functional properties of late endocytic  
683 compartments. *Mol Biol Cell*. 16:5480-5492.
- 684 Johansson, M., N. Rocha, W. Zwart, I. Jordens, L. Janssen, C. Kuijl, V.M. Olkkonen, and J. Neefjes. 2007.  
685 Activation of endosomal dynein motors by stepwise assembly of Rab7-RILP-p150Glued, ORP1L,  
686 and the receptor betalll spectrin. *J Cell Biol*. 176:459-471.
- 687 Keyomarsi, K. 1996. Synchronization of mammalian cells by Lovastatin. *Methods in Cell Science*. 18:109-  
688 114.
- 689 Kimura, S., T. Noda, and T. Yoshimori. 2008. Dynein-dependent movement of autophagosomes mediates  
690 efficient encounters with lysosomes. *Cell Struct Funct*. 33:109-122.
- 691 Klumperman, J., and G. Raposo. 2014. The complex ultrastructure of the endolysosomal system. *Cold  
692 Spring Harb Perspect Biol*. 6:a016857.
- 693 Korolchuk, V.I., and D.C. Rubinsztein. 2011. Regulation of autophagy by lysosomal positioning. *Autophagy*.  
694 7:927-928.
- 695 Korolchuk, V.I., S. Saiki, M. Lichtenberg, F.H. Siddiqi, E.A. Roberts, S. Imarisio, L. Jahreiss, S. Sarkar, M.  
696 Futter, F.M. Menzies, C.J. O'Kane, V. Deretic, and D.C. Rubinsztein. 2011. Lysosomal positioning  
697 coordinates cellular nutrient responses. *Nat Cell Biol*. 13:453-460.
- 698 Levet, F., E. Hosity, A. Kechkar, C. Butler, A. Beghin, D. Choquet, and J.B. Sibarita. 2015. SR-Tesseler: a  
699 method to segment and quantify localization-based super-resolution microscopy data. *Nat  
700 Methods*. 12:1065-1071.
- 701 Maday, S., A.E. Twelvetrees, A.J. Moughamian, and E.L. Holzbaur. 2014. Axonal transport: cargo-specific  
702 mechanisms of motility and regulation. *Neuron*. 84:292-309.
- 703 McKenney, R.J., W. Huynh, M.E. Tanenbaum, G. Bhabha, and R.D. Vale. 2014. Activation of cytoplasmic  
704 dynein motility by dynactin-cargo adapter complexes. *Science*. 345:337-341.
- 705 Mohan, N., E.M. Sorokina, I.V. Verdeny, A.S. Alvarez, and M. Lakadamyali. 2019. Detyrosinated  
706 microtubules spatially constrain lysosomes facilitating lysosome-autophagosome fusion. *J Cell  
707 Biol*. 218:632-643.
- 708 Nirschl, J.J., M.M. Magiera, J.E. Lazarus, C. Janke, and E.L. Holzbaur. 2016. alpha-Tubulin Tyrosination and  
709 CLIP-170 Phosphorylation Regulate the Initiation of Dynein-Driven Transport in Neurons. *Cell Rep*.  
710 14:2637-2652.
- 711 Olenick, M.A., and E.L.F. Holzbaur. 2019. Dynein activators and adaptors at a glance. *J Cell Sci*. 132.
- 712 Olkkonen, V.M., and S. Li. 2013. Oxysterol-binding proteins: sterol and phosphoinositide sensors  
713 coordinating transport, signaling and metabolism. *Prog Lipid Res*. 52:529-538.
- 714 Perez-Cruz, F. 2008. Kullback-Leibler divergence estimation of continuous distributions. *In IEEE  
715 international symposium on information theory*.
- 716 Pfeffer, S.R. 2001. Rab GTPases: specifying and deciphering organelle identity and function. *Trends Cell  
717 Biol*. 11:487-491.
- 718 Pu, J., C.M. Guardia, T. Keren-Kaplan, and J.S. Bonifacino. 2016. Mechanisms and functions of lysosome  
719 positioning. *J Cell Sci*. 129:4329-4339.
- 720 Puchner, E.M., J.M. Walter, R. Kasper, B. Huang, and W.A. Lim. 2013. Counting molecules in single  
721 organelles with superresolution microscopy allows tracking of the endosome maturation  
722 trajectory. *Proc Natl Acad Sci U S A*. 110:16015-16020.
- 723 Rai, A., D. Pathak, S. Thakur, S. Singh, A.K. Dubey, and R. Mallik. 2016. Dynein Clusters into Lipid  
724 Microdomains on Phagosomes to Drive Rapid Transport toward Lysosomes. *Cell*. 164:722-734.
- 725 Reck-Peterson, S.L., W.B. Redwine, R.D. Vale, and A.P. Carter. 2018. The cytoplasmic dynein transport  
726 machinery and its many cargoes. *Nat Rev Mol Cell Biol*. 19:382-398.

- 727 Rocha, N., C. Kuijl, R. van der Kant, L. Janssen, D. Houben, H. Janssen, W. Zwart, and J. Neefjes. 2009.  
728 Cholesterol sensor ORP1L contacts the ER protein VAP to control Rab7-RILP-p150 Glued and late  
729 endosome positioning. *J Cell Biol.* 185:1209-1225.
- 730 Rosa-Ferreira, C., and S. Munro. 2011. Arl8 and SKIP act together to link lysosomes to kinesin-1. *Dev Cell.*  
731 21:1171-1178.
- 732 Schroeder, C.M., and R.D. Vale. 2016. Assembly and activation of dynein-dynactin by the cargo adaptor  
733 protein Hook3. *J Cell Biol.* 214:309-318.
- 734 Soppina, V., A.K. Rai, A.J. Ramaiya, P. Barak, and R. Mallik. 2009. Tug-of-war between dissimilar teams of  
735 microtubule motors regulates transport and fission of endosomes. *Proc Natl Acad Sci U S A.*  
736 106:19381-19386.
- 737 Tanemura, M. 2003. Statistical distributions of Poisson Voronoi cells in two and three dimensions. *FORMA-*  
738 *TOKYO.* 18:221-247.
- 739 Torres, S., E. Balboa, S. Zanlungo, C. Enrich, C. Garcia-Ruiz, and J.C. Fernandez-Checa. 2017. Lysosomal and  
740 Mitochondrial Liaisons in Niemann-Pick Disease. *Front Physiol.* 8:982.
- 741 Urnavicius, L., C.K. Lau, M.M. Elshenawy, E. Morales-Rios, C. Motz, A. Yildiz, and A.P. Carter. 2018. Cryo-  
742 EM shows how dynactin recruits two dyneins for faster movement. *Nature.* 554:202-206.
- 743 van der Kant, R., I. Zondervan, L. Janssen, and J. Neefjes. 2013. Cholesterol-binding molecules MLN64 and  
744 ORP1L mark distinct late endosomes with transporters ABCA3 and NPC1. *J Lipid Res.* 54:2153-  
745 2165.
- 746 Vanlandingham, P.A., and B.P. Ceresa. 2009. Rab7 regulates late endocytic trafficking downstream of  
747 multivesicular body biogenesis and cargo sequestration. *J Biol Chem.* 284:12110-12124.
- 748 Verdeny-Vilanova, I., F. Wehnekamp, N. Mohan, A. Sandoval Alvarez, J.S. Borbely, J.J. Otterstrom, D.C.  
749 Lamb, and M. Lakadamyali. 2017. 3D motion of vesicles along microtubules helps them to  
750 circumvent obstacles in cells. *J Cell Sci.* 130:1904-1916.
- 751 Vihervaara, T., R.L. Uronen, G. Wohlfahrt, I. Bjorkhem, E. Ikonen, and V.M. Olkkonen. 2011. Sterol binding  
752 by OSBP-related protein 1L regulates late endosome motility and function. *Cell Mol Life Sci.*  
753 68:537-551.
- 754 Wijdeven, R.H., H. Janssen, L. Nahidiazar, L. Janssen, K. Jalink, I. Berlin, and J. Neefjes. 2016. Cholesterol  
755 and ORP1L-mediated ER contact sites control autophagosome transport and fusion with the  
756 endocytic pathway. *Nat Commun.* 7:11808.
- 757 Znacchi, F.C., C. Manzo, A.S. Alvarez, N.D. Derr, M.F. Garcia-Parajo, and M. Lakadamyali. 2017a. A DNA  
758 origami platform for quantifying protein copy number in super-resolution. *Nat Methods.* 14:789-  
759 792.
- 760 Znacchi, F.C., C. Manzo, A.S. Alvarez, N.D. Derr, M.F. Garcia-Parajo, and M. Lakadamyali. 2017b. A DNA  
761 origami platform for quantifying protein copy number in super-resolution. *Nature Methods.*  
762 14:789-792.
- 763 Zhao, K., and N.D. Ridgway. 2017. Oxysterol-Binding Protein-Related Protein 1L Regulates Cholesterol  
764 Egress from the Endo-Lysosomal System. *Cell Rep.* 19:1807-1818.

765
